# Supplementary material for: Study on heterogeneous OH oxidation of 3-methyltetraol sulfate in the atmosphere under high NO conditions
Source: Royal Society of Chemistry journal article supplement (doi:10.1039/d2ra02958h), 2022-01-01
Supplement: d2ra02958h1.pdf [file d2ra02958h1.pdf]

**Supplementary information for**  
**Study on Heterogeneous OH Oxidation of 3-Methyltetraol Sulfate in the**  
**Atmosphere under High NO Conditions**

Chuanen Guo<sup>a</sup>, Luyao Xu<sup>b</sup>, Chenxi Zhang<sup>c,d\*</sup>

<sup>a</sup>Judicial Expertise Center, Shandong University of Political Science and Law, Jinan  
250014, P.R.China.

<sup>b</sup>Environment Research Institute, Shandong University, Qingdao 266200, P.R.China.

<sup>c</sup>Jia Si-xie Agricultural College, Weifang University of Science and Technology,  
Weifang 262700, P.R.China.

<sup>d</sup>College of Biological and Environmental Engineering, Binzhou University, Binzhou  
256600, P.R.China.

**Table S1. The relative Gibbs energy  $\Delta G$  (kcal/mol) at M06-2X/6-311++G(d,p) and DLPNO-CCSD(T)/cc-pVTZ level of theory**

| Reaction                                                                            | $\Delta G_{ts-R}$ | $\Delta G_{ts-R}$ | $\Delta G_{im-R}$ | $\Delta G_{im-R}$ |
|-------------------------------------------------------------------------------------|-------------------|-------------------|-------------------|-------------------|
|                                                                                     | (M06-2X)          | (DLPNO-CCSD)      | (M06-2X)          | (DLPNO-CCSD)      |
| R+OH $\rightarrow$ 1-ts1-1 $\rightarrow$ 1-im1+H <sub>2</sub> O                     | 1.02              | 4.61              | -31.02            | -22.96            |
| R+OH $\rightarrow$ 1-ts1-2 $\rightarrow$ 1-im1+H <sub>2</sub> O                     | 2.31              | 5.99              | -31.02            | -22.96            |
| R+OH $\rightarrow$ 1-ts1-1 $\rightarrow$ 2-im1+H <sub>2</sub> O                     | 3.00              | 6.63              | -25.27            | -16.22            |
| R+OH $\rightarrow$ 2-ts1-2 $\rightarrow$ 2-im1+H <sub>2</sub> O                     | 4.02              | 7.24              | -25.27            | -16.22            |
| R+OH $\rightarrow$ 2-ts1-3 $\rightarrow$ 2-im1+H <sub>2</sub> O                     | 5.33              | 11.27             | -25.27            | -16.22            |
| R+OH $\rightarrow$ 3-ts1 $\rightarrow$ 3-im1+H <sub>2</sub> O                       | 0.99              | 3.09              | -33.40            | -25.44            |
| R+OH $\rightarrow$ 4-ts1-1 $\rightarrow$ 4-im1+H <sub>2</sub> O                     | 3.19              | 5.89              | -28.45            | -21.22            |
| R+OH $\rightarrow$ 4-ts1-2 $\rightarrow$ 4-im1+H <sub>2</sub> O                     | 3.44              | 5.67              | -28.45            | -21.22            |
| 1-im1+O <sub>2</sub> $\rightarrow$ 1-im2                                            | -                 | -                 | -26.13            | -20.34            |
| 1-im2+NO $\rightarrow$ 1-im3                                                        | -                 | -                 | -6.91             | -5.70             |
| 1-im3 $\rightarrow$ 1-ts2 $\rightarrow$ 1-im4+NO <sub>2</sub> +HCOOH                | 25.20             | 25.32             | -25.54            | -34.57            |
| 1-im4+O <sub>2</sub> $\rightarrow$ 1-im5                                            | -                 | -                 | -26.78            | -21.21            |
| 1-im5+NO $\rightarrow$ 1-im6                                                        | -                 | -                 | -6.77             | -5.01             |
| 1-im6 $\rightarrow$ 1-ts3 $\rightarrow$ 1-im7+NO <sub>2</sub> +CH <sub>3</sub> COOH | 25.74             | 27.03             | -28.53            | -36.69            |
| 1-im7 $\rightarrow$ 1-ts4 $\rightarrow$ 1-im8+HSO <sub>4</sub> <sup>-</sup>         | 8.24              | 15.79             | -10.49            | -10.46            |
| 1-im8+H <sub>2</sub> O $\rightarrow$ 1-ts5 $\rightarrow$ CH <sub>3</sub> CHO+OH     | 33.45             | 37.57             | 25.52             | 19.00             |
| 3-im1+O <sub>2</sub> $\rightarrow$ 3-im2                                            | -                 | -                 | -23.77            | -19.84            |
| 3-im2+NO $\rightarrow$ 3-im3                                                        | -                 | -                 | -6.29             | -3.91             |
| 3-im3 $\rightarrow$ 3-ts2 $\rightarrow$ 3-im4+P2+NO <sub>2</sub>                    | 31.07             | 31.43             | -21.51            | -29.71            |
| 3-im4+O <sub>2</sub> $\rightarrow$ 3-im5                                            | -                 | -                 | -28.15            | -20.24            |
| 3-im5+NO $\rightarrow$ 3-im6                                                        | -                 | -                 | -8.90             | -6.26             |
| 3-im6 $\rightarrow$ 3-ts3 $\rightarrow$ 3-im7+NO <sub>2</sub>                       | 37.05             | 37.91             | -11.98            | -19.05            |
| 3-im7 $\rightarrow$ 3-ts4 $\rightarrow$ 3-im8+HSO <sub>4</sub> <sup>-</sup>         | 16.76             | 14.10             | -3.65             | -7.26             |
| 3-im8+H <sub>2</sub> O $\rightarrow$ 3-ts5 $\rightarrow$ HCHO+OH                    | 36.00             | 36.13             | 28.56             | 26.36             |

**Table S2.** Cartesian coordinates for all the optimized structures of reactants, transition states and products

3-MTS

|   |             |             |             |
|---|-------------|-------------|-------------|
| C | 3.14913900  | 0.89300300  | -0.29342100 |
| H | 3.01233900  | 1.71165800  | 0.41645900  |
| H | 2.96591400  | 1.25799000  | -1.30973100 |
| C | 2.17406800  | -0.24174300 | 0.01758600  |
| C | 0.75176200  | 0.21379100  | -0.34073800 |
| H | 0.72578000  | 0.36467400  | -1.42768700 |
| C | 2.29916500  | -0.69050700 | 1.46985000  |
| H | 1.98437500  | 0.10680400  | 2.14636900  |
| H | 1.68507000  | -1.57422800 | 1.65393000  |
| H | 3.33750300  | -0.94427500 | 1.69273800  |
| O | 4.46780500  | 0.35924000  | -0.19265000 |
| H | 5.08944000  | 1.02872900  | -0.49615300 |
| O | 2.44848600  | -1.33302000 | -0.86359200 |
| H | 3.39026000  | -1.53197200 | -0.78298300 |
| O | 0.50554400  | 1.44259400  | 0.32674500  |
| H | -0.45114900 | 1.61124800  | 0.32302600  |
| O | -1.49281300 | -0.63881200 | -0.75573200 |
| S | -2.76139000 | 0.05157700  | -0.00529700 |
| O | -3.07708000 | -0.80439400 | 1.14252700  |
| O | -3.77235300 | 0.06296100  | -1.05956200 |
| O | -2.29123600 | 1.39433300  | 0.39182300  |
| C | -0.28013400 | -0.84753200 | 0.00647000  |
| H | -0.50600500 | -0.84632900 | 1.07580500  |
| H | 0.07788900  | -1.83482000 | -0.28195200 |

1-ts-1

|   |            |             |             |
|---|------------|-------------|-------------|
| C | 3.01236000 | 0.18207400  | -0.67015600 |
| H | 2.95982500 | 1.27466000  | -0.31191100 |
| H | 2.83864600 | 0.18972000  | -1.74811900 |
| C | 1.93697200 | -0.64186400 | 0.05180700  |
| C | 0.55236400 | -0.21434800 | -0.46114200 |
| H | 0.51867800 | -0.45021600 | -1.53210100 |
| C | 2.06414400 | -0.53501600 | 1.56652600  |
| H | 1.86153600 | 0.48429700  | 1.90105400  |
| H | 1.36474900 | -1.21654200 | 2.05416700  |
| H | 3.07158700 | -0.81417300 | 1.88751700  |
| O | 4.31443700 | -0.29889400 | -0.45482100 |
| H | 4.53611800 | -0.21641600 | 0.48130600  |

|        |             |             |             |
|--------|-------------|-------------|-------------|
| O      | 2.07908200  | -1.99835000 | -0.36922200 |
| H      | 2.98122700  | -2.27691300 | -0.16554700 |
| O      | 0.41603400  | 1.18816200  | -0.27399100 |
| H      | -0.52845000 | 1.42129500  | -0.24872000 |
| O      | -1.77813300 | -0.87256800 | -0.55989700 |
| S      | -2.95421800 | 0.10566200  | -0.00099900 |
| O      | -3.32686500 | -0.40942300 | 1.31984700  |
| O      | -3.98297700 | -0.03091000 | -1.02773200 |
| O      | -2.33553900 | 1.44563000  | 0.05883200  |
| C      | -0.56558300 | -0.98536000 | 0.22128400  |
| H      | -0.73638500 | -0.61795500 | 1.23645300  |
| H      | -0.33042100 | -2.04769900 | 0.25974000  |
| O      | 2.73335400  | 2.63892000  | 0.26723300  |
| H      | 1.77369500  | 2.44589700  | 0.27024100  |
| 1-ts-2 |             |             |             |
| C      | 2.94474000  | 0.11240500  | 0.79435200  |
| H      | 2.72121100  | -0.08518600 | 1.84184900  |
| H      | 2.87709400  | 1.25681600  | 0.64162100  |
| C      | 1.92083800  | -0.50942100 | -0.16059800 |
| C      | 0.54721200  | 0.13159700  | 0.09471300  |
| H      | 0.62257600  | 1.18346700  | -0.21087000 |
| C      | 1.90372000  | -2.02545700 | -0.01699600 |
| H      | 1.53958400  | -2.30729100 | 0.97246600  |
| H      | 1.25841900  | -2.47589800 | -0.77421500 |
| H      | 2.91289300  | -2.42340100 | -0.14243100 |
| O      | 4.26238100  | -0.29479700 | 0.54566400  |
| H      | 4.46637700  | -0.12520300 | -0.38403600 |
| O      | 2.27714900  | -0.12442000 | -1.49258000 |
| H      | 2.82868700  | -0.81178900 | -1.88544400 |
| O      | 0.27980300  | 0.04524300  | 1.48552200  |
| H      | -0.66694800 | 0.21045100  | 1.62943900  |
| O      | -1.66787500 | 0.37720700  | -0.88324100 |
| S      | -2.98026000 | 0.10361500  | 0.03828600  |
| O      | -3.43981500 | -1.24976800 | -0.28954600 |
| O      | -3.88019000 | 1.17475300  | -0.38322400 |
| O      | -2.50728000 | 0.22788000  | 1.43204100  |
| C      | -0.53970500 | -0.51817000 | -0.74583000 |
| H      | -0.86448300 | -1.46700100 | -0.31071600 |
| H      | -0.18298900 | -0.69276700 | -1.75975100 |
| O      | 3.01390500  | 2.46762300  | -0.28262200 |
| H      | 2.80629300  | 1.94447500  | -1.08043100 |
| 2-ts-1 |             |             |             |
| C      | 3.00367000  | -0.18010300 | -0.99372800 |
| H      | 2.94203500  | 0.86400900  | -1.30581500 |

|        |             |             |             |
|--------|-------------|-------------|-------------|
| H      | 2.73376700  | -0.82322100 | -1.83413800 |
| C      | 2.04206800  | -0.45091000 | 0.16910900  |
| C      | 0.59795300  | -0.43864700 | -0.35608800 |
| H      | 0.49424700  | -1.31361600 | -1.00900400 |
| C      | 2.28114400  | 0.51171400  | 1.32372900  |
| H      | 2.00662200  | 1.61010600  | 1.00267600  |
| H      | 1.66379500  | 0.29317400  | 2.19545900  |
| H      | 3.33478100  | 0.56474100  | 1.60615900  |
| O      | 4.33784100  | -0.52031300 | -0.63221100 |
| H      | 4.72419400  | 0.21203800  | -0.13923300 |
| O      | 2.25843100  | -1.78112900 | 0.64007900  |
| H      | 3.21472600  | -1.89163100 | 0.73555100  |
| O      | 0.41493400  | 0.75051300  | -1.11699400 |
| H      | -0.53328100 | 0.84142300  | -1.32028500 |
| O      | -1.66957900 | -1.09260100 | 0.29651800  |
| S      | -2.86268800 | -0.04579800 | -0.06583600 |
| O      | -3.10702000 | 0.73673500  | 1.14949700  |
| O      | -3.94920800 | -0.94302100 | -0.45034500 |
| O      | -2.33936600 | 0.77207800  | -1.17902900 |
| C      | -0.41115300 | -0.56715300 | 0.77544500  |
| H      | -0.56917800 | 0.39315600  | 1.27477700  |
| H      | -0.06218900 | -1.29597000 | 1.50618700  |
| O      | 1.52418000  | 2.79432100  | 0.42691000  |
| H      | 1.00968200  | 2.29648100  | -0.24515300 |
| 2-ts-2 |             |             |             |
| C      | -2.73247900 | -1.07511000 | 0.63170000  |
| H      | -2.72459100 | -0.66765800 | 1.64540200  |
| H      | -2.37464500 | -2.10636700 | 0.65717000  |
| C      | -1.81170500 | -0.24297700 | -0.27863000 |
| C      | -0.34887900 | -0.61958400 | 0.02205400  |
| H      | -0.23321000 | -1.67300200 | -0.26392200 |
| C      | -2.03811000 | 1.24801800  | -0.09444100 |
| H      | -1.69192600 | 1.60822000  | 0.87474600  |
| H      | -1.62834700 | 1.84436300  | -0.91172900 |
| H      | -3.18262100 | 1.46493500  | -0.12621000 |
| O      | -4.05394100 | -1.11744300 | 0.11096100  |
| H      | -4.45771900 | -0.24336100 | 0.23653300  |
| O      | -2.04428800 | -0.62082400 | -1.63062600 |
| H      | -2.99331700 | -0.79116400 | -1.71160700 |
| O      | -0.14011600 | -0.46484600 | 1.41601500  |
| H      | 0.81410300  | -0.39435300 | 1.58649300  |
| O      | 1.91050200  | -0.45941000 | -0.85515100 |
| S      | 3.11101900  | 0.13548200  | 0.06864000  |
| O      | 3.30853200  | 1.52467800  | -0.35724000 |

|        |             |             |             |
|--------|-------------|-------------|-------------|
| O      | 4.21632400  | -0.76630000 | -0.24602200 |
| O      | 2.61886500  | 0.02401200  | 1.45688900  |
| C      | 0.62412200  | 0.20079200  | -0.80817400 |
| H      | 0.73343600  | 1.21266300  | -0.40851000 |
| H      | 0.28545800  | 0.25980300  | -1.84165900 |
| O      | -4.57591800 | 1.65929600  | 0.25365600  |
| H      | -4.40029800 | 2.01807800  | 1.14214200  |
| 2-ts-3 |             |             |             |
| C      | 2.99617500  | -1.36359500 | -0.17528800 |
| H      | 2.84031700  | -1.70288700 | -1.19861700 |
| H      | 2.73859100  | -2.17573200 | 0.51382400  |
| C      | 2.08946800  | -0.15603800 | 0.13147400  |
| C      | 0.64377900  | -0.65712300 | 0.26060400  |
| H      | 0.60871200  | -1.29129800 | 1.15620700  |
| C      | 2.26597600  | 0.90036300  | -0.94178600 |
| H      | 1.75357100  | 0.64708800  | -1.87007600 |
| H      | 1.82624800  | 1.91521200  | -0.57016900 |
| H      | 3.31799800  | 1.12440600  | -1.12810400 |
| O      | 4.36971000  | -1.03027900 | -0.05685700 |
| H      | 4.55520400  | -0.85192400 | 0.87258400  |
| O      | 2.42964700  | 0.35255900  | 1.42071800  |
| H      | 3.17398100  | 0.95997500  | 1.33207600  |
| O      | 0.34903100  | -1.42930600 | -0.89325300 |
| H      | -0.61501600 | -1.47538200 | -1.00543000 |
| O      | -1.58370800 | -0.04112000 | 0.98992100  |
| S      | -2.86150900 | -0.13897800 | -0.01295300 |
| O      | -3.12411800 | 1.22521000  | -0.48215900 |
| O      | -3.89353500 | -0.69767000 | 0.85681800  |
| O      | -2.42821800 | -1.04548700 | -1.09545900 |
| C      | -0.34309200 | 0.47962300  | 0.45754400  |
| H      | -0.52905800 | 1.00676500  | -0.48272100 |
| H      | 0.02936500  | 1.18506200  | 1.19843200  |
| O      | 1.34460300  | 3.23619000  | -0.28138700 |
| H      | 0.46310400  | 3.10219500  | -0.67276800 |
| 3-ts-1 |             |             |             |
| C      | 3.06652200  | -0.11150300 | 0.91380100  |
| H      | 2.89282700  | -0.86506400 | 1.68504700  |
| H      | 2.92106300  | 0.88658600  | 1.34027400  |
| C      | 2.09088400  | -0.31068200 | -0.24611200 |
| C      | 0.67859800  | 0.06810200  | 0.21709300  |
| H      | 0.71119500  | 1.20290200  | 0.40511400  |
| C      | 2.14986600  | -1.73700900 | -0.78409600 |
| H      | 1.78335700  | -2.44268000 | -0.03568700 |
| H      | 1.54484400  | -1.82872400 | -1.68805700 |

|        |             |             |             |
|--------|-------------|-------------|-------------|
| H      | 3.18126900  | -1.99477900 | -1.03250900 |
| O      | 4.38186200  | -0.23349100 | 0.37946500  |
| H      | 5.01012100  | 0.03920500  | 1.05595200  |
| O      | 2.41244000  | 0.62251000  | -1.28080500 |
| H      | 3.35892000  | 0.53712100  | -1.45747700 |
| O      | 0.39277700  | -0.58907900 | 1.41962500  |
| H      | -0.57334900 | -0.63897900 | 1.53897500  |
| O      | -1.54414100 | 0.66283100  | -0.54755900 |
| S      | -2.85244100 | -0.10523000 | 0.04906200  |
| O      | -3.27063500 | -1.06603000 | -0.97505500 |
| O      | -3.77826200 | 1.00111000  | 0.27251400  |
| O      | -2.37556900 | -0.75595000 | 1.28658500  |
| C      | -0.37899700 | -0.13006800 | -0.85572600 |
| H      | -0.64924500 | -1.18623700 | -0.94576900 |
| H      | -0.01107600 | 0.23076700  | -1.81497100 |
| O      | 1.04437900  | 2.69036900  | 0.10003300  |
| H      | 1.72508400  | 2.41236900  | -0.54405400 |
| 4-ts-1 |             |             |             |
| C      | 3.05901600  | -0.87196900 | -0.67013800 |
| H      | 2.95358400  | -0.58200100 | -1.71752500 |
| H      | 2.76713400  | -1.92039200 | -0.55118000 |
| C      | 2.17059500  | 0.00192600  | 0.21562100  |
| C      | 0.70236700  | -0.37365000 | -0.02856100 |
| H      | 0.57749000  | -1.42186100 | 0.27260500  |
| C      | 2.44546200  | 1.48343700  | -0.02405100 |
| H      | 2.16729400  | 1.76919300  | -1.04083800 |
| H      | 1.88480800  | 2.09895800  | 0.68257600  |
| H      | 3.50890600  | 1.68789200  | 0.11594000  |
| O      | 4.40346400  | -0.68335100 | -0.23223800 |
| H      | 4.94297300  | -1.39132000 | -0.59811800 |
| O      | 2.42160600  | -0.33200800 | 1.58146200  |
| H      | 3.38074000  | -0.32149100 | 1.69908900  |
| O      | 0.43638100  | -0.22806500 | -1.41322200 |
| H      | -0.36817600 | -0.73429500 | -1.60238000 |
| O      | -1.47910700 | -0.11760800 | 1.15615600  |
| S      | -2.58456500 | -0.42847800 | -0.01556000 |
| O      | -2.78815200 | 0.84760400  | -0.71436000 |
| O      | -3.72142600 | -0.88636400 | 0.77148400  |
| O      | -1.98719700 | -1.46255500 | -0.87494900 |
| C      | -0.22271900 | 0.46599200  | 0.84728600  |
| H      | -0.38279000 | 1.49831700  | 0.32823500  |
| H      | 0.22394800  | 0.68988500  | 1.81542700  |
| O      | -0.74252400 | 2.72594600  | -0.33927700 |
| H      | -1.57556000 | 2.33955900  | -0.67625400 |

## 4-ts-2

|   |             |             |             |
|---|-------------|-------------|-------------|
| C | -3.09495600 | -1.16416300 | -0.35511700 |
| H | -2.88520500 | -2.07072700 | 0.21618100  |
| H | -2.96340500 | -1.36790900 | -1.42271600 |
| C | -2.14447200 | -0.04273500 | 0.06450500  |
| C | -0.73151700 | -0.37382200 | -0.43923200 |
| H | -0.74188000 | -0.28892800 | -1.53250500 |
| C | -2.19382500 | 0.18816600  | 1.57028400  |
| H | -1.77745100 | -0.67160700 | 2.09999800  |
| H | -1.62621700 | 1.08116700  | 1.84075400  |
| H | -3.22694700 | 0.32865700  | 1.89339100  |
| O | -4.42066200 | -0.70559600 | -0.10007500 |
| H | -5.03633200 | -1.28799800 | -0.55630300 |
| O | -2.53133000 | 1.14679900  | -0.63498800 |
| H | -3.47904000 | 1.26799400  | -0.48599800 |
| O | -0.43332000 | -1.70875300 | -0.05403800 |
| H | 0.52911900  | -1.83702100 | -0.04679300 |
| O | 1.51412500  | 0.45124800  | -0.68774300 |
| S | 2.83883300  | -0.21518600 | 0.02744900  |
| O | 3.13124700  | 0.62120500  | 1.19204900  |
| O | 3.82240300  | -0.15193900 | -1.04699100 |
| O | 2.40081300  | -1.57745500 | 0.37971300  |
| C | 0.33628500  | 0.56538500  | 0.09579000  |
| H | 0.53912100  | 0.41543400  | 1.15977100  |
| H | 0.00402800  | 1.67743300  | -0.00786000 |
| O | -0.52925900 | 2.99144900  | -0.15575600 |
| H | -1.41835500 | 2.62383800  | -0.35184800 |

## 1-im-1

|   |             |             |             |
|---|-------------|-------------|-------------|
| C | 3.15738000  | 0.83722100  | -0.38377900 |
| H | 2.97781000  | 1.44990600  | -1.26202900 |
| C | 2.20898600  | -0.25833800 | -0.02199100 |
| C | 0.78114400  | 0.20932400  | -0.35134200 |
| H | 0.73619600  | 0.36854800  | -1.43678900 |
| C | 2.36975300  | -0.68853300 | 1.43305600  |
| H | 2.11829000  | 0.13284100  | 2.10644700  |
| H | 1.72455600  | -1.54148400 | 1.65208200  |
| H | 3.40349600  | -0.98553100 | 1.62118700  |
| O | 4.46708300  | 0.58871100  | -0.06112900 |
| H | 5.03452400  | 1.23161500  | -0.50220200 |
| O | 2.42429800  | -1.39652200 | -0.88784800 |
| H | 3.31172400  | -1.73144100 | -0.70994700 |
| O | 0.55335400  | 1.43295900  | 0.33058800  |
| H | -0.40216300 | 1.61016300  | 0.33407900  |
| O | -1.46923800 | -0.63580600 | -0.74813600 |



|        |             |             |             |
|--------|-------------|-------------|-------------|
| S      | -2.72804400 | 0.06668500  | 0.00705800  |
| O      | -3.04513800 | -0.78456100 | 1.15815500  |
| O      | -3.74419600 | 0.08407200  | -1.04226300 |
| O      | -2.24509900 | 1.40626300  | 0.39931100  |
| C      | -0.25241100 | -0.84736500 | 0.00677000  |
| H      | -0.47110400 | -0.83883600 | 1.07761400  |
| H      | 0.09774300  | -1.83752000 | -0.27909000 |
| 1-im-2 |             |             |             |
| C      | 3.16741700  | 0.86130800  | -0.33076400 |
| H      | 2.96405200  | 1.89098100  | -0.06349600 |
| C      | 2.20700600  | -0.23877200 | 0.01155300  |
| C      | 0.78308300  | 0.21152000  | -0.35469900 |
| H      | 0.75706200  | 0.34345700  | -1.44398700 |
| C      | 2.33194500  | -0.64371500 | 1.48335300  |
| H      | 2.03822100  | 0.18287000  | 2.13296700  |
| H      | 1.70452800  | -1.51107400 | 1.70183300  |
| H      | 3.36989400  | -0.90512700 | 1.70226700  |
| O      | 4.47957900  | 0.45924600  | -0.30786900 |
| H      | 5.05587100  | 1.22972000  | -0.37134800 |
| O      | 2.46735400  | -1.37257800 | -0.82497900 |
| H      | 3.34992200  | -1.69970600 | -0.61203300 |
| O      | 0.53976200  | 1.45069700  | 0.29287500  |
| H      | -0.41777800 | 1.61489800  | 0.30011500  |
| O      | -1.46180500 | -0.63953100 | -0.75192300 |
| S      | -2.73093000 | 0.05560400  | -0.00681600 |
| O      | -3.05407200 | -0.79880600 | 1.14015500  |
| O      | -3.73782800 | 0.07000100  | -1.06491000 |
| O      | -2.25692200 | 1.39672100  | 0.39150100  |
| C      | -0.25013200 | -0.84155700 | 0.01356000  |
| H      | -0.47546600 | -0.81949000 | 1.08281100  |
| H      | 0.10411000  | -1.83488100 | -0.25688500 |
| 2-im-1 |             |             |             |
| C      | 3.19682900  | 0.84560000  | -0.32237600 |
| H      | 3.02403700  | 1.73636100  | 0.28545600  |
| H      | 3.07691400  | 1.09576900  | -1.38113600 |
| C      | 2.19579200  | -0.24947100 | 0.04859800  |
| C      | 0.78139600  | 0.19442900  | -0.38603900 |
| H      | 0.78830100  | 0.27166500  | -1.48077300 |
| C      | 2.26965000  | -0.56394200 | 1.50721400  |
| H      | 2.07137500  | -1.57241600 | 1.84741800  |
| H      | 2.40117600  | 0.22822100  | 2.23243900  |
| O      | 4.49799400  | 0.31558100  | -0.08131000 |
| H      | 5.14320300  | 0.88665500  | -0.51086500 |
| O      | 2.47310600  | -1.41257800 | -0.73224400 |

|   |             |             |             |
|---|-------------|-------------|-------------|
| H | 3.40875100  | -1.61799000 | -0.60553500 |
| O | 0.52755800  | 1.46339100  | 0.19401500  |
| H | -0.43242800 | 1.61190300  | 0.21962600  |
| O | -1.47224900 | -0.64198200 | -0.74482000 |
| S | -2.74045200 | 0.04742400  | 0.00873700  |
| O | -3.05441600 | -0.81050900 | 1.15535200  |
| O | -3.75261100 | 0.06121700  | -1.04413100 |
| O | -2.26627100 | 1.38853500  | 0.40697600  |
| C | -0.25695500 | -0.83958500 | 0.01430300  |
| H | -0.46689200 | -0.78800300 | 1.08626300  |
| H | 0.08763400  | -1.84236800 | -0.23359700 |

2-im-2

|   |             |             |             |
|---|-------------|-------------|-------------|
| C | 3.19681400  | 0.84559700  | -0.32239200 |
| H | 3.02401800  | 1.73636600  | 0.28542500  |
| H | 3.07689300  | 1.09574700  | -1.38115600 |
| C | 2.19577700  | -0.24947300 | 0.04860000  |
| C | 0.78138400  | 0.19442800  | -0.38603900 |
| H | 0.78828700  | 0.27167000  | -1.48077300 |
| C | 2.26962500  | -0.56391300 | 1.50722300  |
| H | 2.40093900  | 0.22829300  | 2.23243900  |
| H | 2.07161800  | -1.57243600 | 1.84743300  |
| O | 4.49797900  | 0.31558200  | -0.08132100 |
| H | 5.14318900  | 0.88666300  | -0.51086400 |
| O | 2.47309700  | -1.41259100 | -0.73222000 |
| H | 3.40874900  | -1.61797900 | -0.60552800 |
| O | 0.52755400  | 1.46338800  | 0.19402200  |
| H | -0.43243700 | 1.61189100  | 0.21965200  |
| O | -1.47225900 | -0.64201000 | -0.74481900 |
| S | -2.74043700 | 0.04742900  | 0.00873900  |
| O | -3.05443300 | -0.81051700 | 1.15533800  |
| O | -3.75258200 | 0.06125600  | -1.04414400 |
| O | -2.26621100 | 1.38852100  | 0.40698700  |
| C | -0.25696100 | -0.83959400 | 0.01430100  |
| H | -0.46690000 | -0.78800800 | 1.08626200  |
| H | 0.08763400  | -1.84237600 | -0.23359500 |

2-im-3

|   |            |             |             |
|---|------------|-------------|-------------|
| C | 3.19682900 | 0.84560400  | -0.32236700 |
| H | 3.02403900 | 1.73634800  | 0.28549000  |
| H | 3.07690200 | 1.09579900  | -1.38111900 |
| C | 2.19580400 | -0.24947700 | 0.04859100  |
| C | 0.78140200 | 0.19442100  | -0.38603100 |
| H | 0.78830000 | 0.27165100  | -1.48076500 |
| C | 2.26968400 | -0.56399000 | 1.50719700  |
| H | 2.40142900 | 0.22812200  | 2.23243700  |

|   |             |             |             |
|---|-------------|-------------|-------------|
| H | 2.07116600  | -1.57242200 | 1.84738900  |
| O | 4.49799600  | 0.31558600  | -0.08132700 |
| H | 5.14321900  | 0.88684100  | -0.51062700 |
| O | 2.47310900  | -1.41256700 | -0.73228600 |
| H | 3.40873900  | -1.61802800 | -0.60554400 |
| O | 0.52756700  | 1.46338800  | 0.19401600  |
| H | -0.43241400 | 1.61190800  | 0.21963200  |
| O | -1.47224200 | -0.64198500 | -0.74480400 |
| S | -2.74046300 | 0.04742500  | 0.00873500  |
| O | -3.05441000 | -0.81046600 | 1.15538200  |
| O | -3.75262900 | 0.06117400  | -1.04412400 |
| O | -2.26630700 | 1.38855600  | 0.40693300  |
| C | -0.25695300 | -0.83958300 | 0.01432600  |
| H | -0.46689000 | -0.78798600 | 1.08628500  |
| H | 0.08763800  | -1.84236900 | -0.23355800 |

3-im-1

|   |             |             |             |
|---|-------------|-------------|-------------|
| C | 3.01218600  | 0.96337700  | -0.36272000 |
| H | 2.97962800  | 1.72191300  | 0.42311700  |
| H | 2.59957400  | 1.38010800  | -1.28690200 |
| C | 2.18430600  | -0.25520600 | 0.04700900  |
| C | 0.73320900  | 0.12472700  | 0.14275700  |
| C | 2.68436300  | -0.84009500 | 1.37289300  |
| H | 2.57739300  | -0.10260400 | 2.17177000  |
| H | 2.10152100  | -1.72738600 | 1.63009700  |
| H | 3.73696900  | -1.12232100 | 1.29458900  |
| O | 4.34820400  | 0.51559700  | -0.57317100 |
| H | 4.85038800  | 1.23796700  | -0.96395300 |
| O | 2.27003400  | -1.24308900 | -0.98336700 |
| H | 3.20528800  | -1.45829400 | -1.09186700 |
| O | 0.51114900  | 1.33390800  | 0.73872100  |
| H | -0.45325600 | 1.48008300  | 0.80213300  |
| O | -1.41708000 | -0.66365400 | -0.69728000 |
| S | -2.73189700 | 0.07828000  | -0.09814700 |
| O | -3.33174000 | -0.84853700 | 0.86708500  |
| O | -3.53393500 | 0.31616200  | -1.29602400 |
| O | -2.22187900 | 1.31114900  | 0.54067600  |
| C | -0.31925900 | -0.91827800 | 0.23686200  |
| H | -0.73544900 | -0.99406200 | 1.24867900  |
| H | 0.08142800  | -1.88730900 | -0.05123700 |

4-im-1

|   |            |             |             |
|---|------------|-------------|-------------|
| C | 3.18825600 | 0.81483700  | -0.39204300 |
| H | 3.09973700 | 1.70230900  | 0.23926400  |
| H | 3.00100400 | 1.09044900  | -1.43496000 |
| C | 2.17137700 | -0.24183200 | 0.03609400  |

|        |             |             |             |
|--------|-------------|-------------|-------------|
| C      | 0.76314500  | 0.26068500  | -0.30974500 |
| H      | 0.72526400  | 0.43275100  | -1.39225400 |
| C      | 2.33127000  | -0.58934400 | 1.51203900  |
| H      | 2.09713200  | 0.27310900  | 2.13889300  |
| H      | 1.67622800  | -1.41766700 | 1.78637900  |
| H      | 3.36165400  | -0.89164700 | 1.70971100  |
| O      | 4.48513200  | 0.23610900  | -0.26262500 |
| H      | 5.11587300  | 0.80037700  | -0.72089600 |
| O      | 2.35281500  | -1.40655900 | -0.77087700 |
| H      | 3.29085800  | -1.63565200 | -0.72986600 |
| O      | 0.56273100  | 1.50449800  | 0.37726600  |
| H      | -0.38658700 | 1.70274200  | 0.35530600  |
| O      | -1.44888000 | -0.66048100 | -0.73333800 |
| S      | -2.78828100 | 0.02436200  | -0.01528200 |
| O      | -3.08551400 | -0.82025700 | 1.14147300  |
| O      | -3.76629700 | -0.03046700 | -1.09488200 |
| O      | -2.33737100 | 1.37856600  | 0.34361300  |
| C      | -0.29909700 | -0.72276300 | 0.03363100  |
| H      | -0.39929300 | -1.18732500 | 1.00803100  |
| 4-im-2 |             |             |             |
| C      | 3.18826200  | 0.81483900  | -0.39203000 |
| H      | 3.09971900  | 1.70231200  | 0.23927100  |
| H      | 3.00103400  | 1.09044600  | -1.43495300 |
| C      | 2.17137800  | -0.24183400 | 0.03608500  |
| C      | 0.76315100  | 0.26068800  | -0.30976400 |
| H      | 0.72527900  | 0.43276100  | -1.39227200 |
| C      | 2.33126000  | -0.58936300 | 1.51202700  |
| H      | 2.09713300  | 0.27308400  | 2.13889200  |
| H      | 1.67620300  | -1.41767900 | 1.78635600  |
| H      | 3.36163900  | -0.89168700 | 1.70969800  |
| O      | 4.48514000  | 0.23612300  | -0.26257900 |
| H      | 5.11587500  | 0.80035500  | -0.72090400 |
| O      | 2.35282100  | -1.40655100 | -0.77089800 |
| H      | 3.29085200  | -1.63568000 | -0.72983500 |
| O      | 0.56273000  | 1.50449700  | 0.37725100  |
| H      | -0.38659100 | 1.70272300  | 0.35532100  |
| O      | -1.44888200 | -0.66044500 | -0.73336400 |
| S      | -2.78828400 | 0.02436000  | -0.01527400 |
| O      | -3.08549900 | -0.82030000 | 1.14145500  |
| O      | -3.76630700 | -0.03043900 | -1.09486700 |
| O      | -2.33738100 | 1.37855600  | 0.34366500  |
| C      | -0.29909600 | -0.72275900 | 0.03360000  |
| H      | -0.39929700 | -1.18733200 | 1.00799300  |

1-im2

|       |             |             |             |
|-------|-------------|-------------|-------------|
| C     | 1.66592300  | -0.77602900 | 0.05295200  |
| C     | 0.31778800  | -0.17926700 | -0.38466100 |
| H     | 0.29181300  | -0.22645400 | -1.48095700 |
| C     | 1.76980200  | -0.99166300 | 1.55825300  |
| H     | 1.52505700  | -0.07938300 | 2.10389000  |
| H     | 1.07894100  | -1.78071800 | 1.85966100  |
| H     | 2.78240400  | -1.30101800 | 1.82699900  |
| O     | 3.99844800  | -0.61849200 | -0.42111900 |
| H     | 4.63364900  | -0.23268200 | -1.03759400 |
| O     | 1.75267400  | -2.00819600 | -0.64904400 |
| H     | 2.60579600  | -2.41212800 | -0.44387800 |
| O     | 0.26187700  | 1.16847500  | 0.04732100  |
| H     | -0.66713400 | 1.45497600  | 0.05816300  |
| O     | -2.02864600 | -0.74327500 | -0.64909500 |
| S     | -3.17579700 | 0.22516900  | -0.01899600 |
| O     | -3.62000000 | -0.41471100 | 1.22269300  |
| O     | -4.17245300 | 0.25346400  | -1.08604300 |
| O     | -2.50045000 | 1.51822000  | 0.21215000  |
| C     | -0.84683800 | -1.00336000 | 0.14267200  |
| H     | -1.04215100 | -0.78341200 | 1.19557900  |
| H     | -0.64591600 | -2.06746500 | 0.02998100  |
| C     | 2.81903900  | 0.10392800  | -0.46904300 |
| H     | 2.62052800  | 0.51085500  | -1.46262100 |
| O     | 2.95500800  | 1.25681100  | 0.42663100  |
| O     | 3.76297800  | 2.13683700  | -0.07178300 |
| 1-im3 |             |             |             |
| C     | -0.92435900 | 1.12689400  | 0.06724400  |
| C     | 0.32596300  | 0.36778100  | -0.41024900 |
| H     | 0.34993000  | 0.45634800  | -1.50397300 |
| C     | -1.00562500 | 1.26374500  | 1.58295500  |
| H     | -0.92197100 | 0.29142200  | 2.07087600  |
| H     | -0.19623600 | 1.90701900  | 1.93259600  |
| H     | -1.95580700 | 1.71992300  | 1.86985100  |
| O     | -3.25243400 | 1.39206200  | -0.44877400 |
| H     | -3.79496200 | 1.31177200  | -1.24198900 |
| O     | -0.81878100 | 2.40157000  | -0.55201000 |
| H     | -1.64911500 | 2.87153400  | -0.39762900 |
| O     | 0.21611000  | -0.99327000 | -0.03432000 |
| H     | 1.10358000  | -1.38904200 | -0.02082700 |
| O     | 2.72632300  | 0.57114400  | -0.65569000 |
| S     | 3.74495500  | -0.51993300 | -0.00266100 |
| O     | 4.24745700  | 0.07578100  | 1.23870100  |
| O     | 4.74304500  | -0.67549600 | -1.05705300 |
| O     | 2.91777800  | -1.72115700 | 0.22811900  |

|   |             |             |             |
|---|-------------|-------------|-------------|
| C | 1.59529900  | 1.00505500  | 0.13420900  |
| H | 1.74761100  | 0.74521200  | 1.18506500  |
| H | 1.55818600  | 2.08836600  | 0.03408700  |
| C | -2.20347200 | 0.47170400  | -0.50911000 |
| H | -2.04668800 | 0.12464200  | -1.53308400 |
| O | -2.51114700 | -0.65031100 | 0.31790300  |
| O | -3.56386800 | -1.34556300 | -0.28782800 |
| N | -4.75764700 | -1.00654700 | 0.41692800  |
| O | -5.64662100 | -1.57644900 | -0.05669600 |

l-im4

|   |             |             |             |
|---|-------------|-------------|-------------|
| C | 2.78021200  | 0.03687400  | -0.15096300 |
| C | 1.37400700  | 0.08363500  | -0.66423000 |
| H | 1.34361600  | -0.44144600 | -1.62734700 |
| C | 3.15269300  | 0.63494400  | 1.16114500  |
| H | 2.65101200  | 1.59375400  | 1.29837900  |
| H | 2.87065100  | -0.02232800 | 1.99712900  |
| H | 4.23266400  | 0.79854600  | 1.21955900  |
| O | 3.40934700  | -1.13629200 | -0.51806100 |
| H | 4.23653100  | -1.22597500 | -0.02885000 |
| O | 1.00106300  | 1.44576600  | -0.83195000 |
| H | 0.03399600  | 1.51967300  | -0.77544300 |
| O | -0.83061100 | -0.92836700 | -0.33895800 |
| S | -2.11746000 | -0.02953700 | 0.09402600  |
| O | -2.28037600 | -0.20942900 | 1.53937000  |
| O | -3.18323300 | -0.60881900 | -0.72016000 |
| O | -1.75855700 | 1.35378500  | -0.27694700 |
| C | 0.44141000  | -0.65183700 | 0.29275000  |
| H | 0.29486000  | -0.07888800 | 1.21280100  |
| H | 0.86503100  | -1.62558500 | 0.54079000  |

l-im5

|   |             |             |             |
|---|-------------|-------------|-------------|
| C | 0.80436500  | 0.19503200  | -0.36550800 |
| H | 0.79737100  | 0.32475100  | -1.45478800 |
| C | 2.42225500  | -0.55715300 | 1.48574300  |
| H | 2.13969700  | 0.30883200  | 2.08353600  |
| H | 1.81627000  | -1.41594800 | 1.77923400  |
| H | 3.47391000  | -0.79241900 | 1.66081900  |
| O | 2.54371800  | -1.33151100 | -0.80895000 |
| H | 3.31201700  | -1.79153900 | -0.44565000 |
| O | 0.57580400  | 1.42870800  | 0.28670500  |
| H | -0.38221000 | 1.59432900  | 0.31251200  |
| O | -1.43676400 | -0.65381600 | -0.75652000 |
| S | -2.69695100 | 0.04925500  | 0.00464900  |
| O | -3.00830700 | -0.80461900 | 1.15408700  |
| O | -3.71285600 | 0.06823400  | -1.04339500 |

|       |             |             |             |
|-------|-------------|-------------|-------------|
| O     | -2.20789400 | 1.38637800  | 0.39657000  |
| C     | -0.22507200 | -0.86629500 | -0.00393200 |
| H     | -0.43747800 | -0.85604200 | 1.06847000  |
| H     | 0.13164800  | -1.85470000 | -0.28962100 |
| C     | 2.20648600  | -0.27758100 | 0.01868900  |
| O     | 3.06020600  | 0.89336900  | -0.35637000 |
| O     | 4.31756900  | 0.60458500  | -0.32198500 |
| 1-im6 |             |             |             |
| C     | 0.18101400  | 0.23059200  | -0.19657600 |
| H     | 0.27653600  | 0.50889500  | -1.25352600 |
| C     | 1.58461100  | -0.87510000 | 1.64614200  |
| H     | 1.23018600  | -0.12381200 | 2.35159800  |
| H     | 0.94976200  | -1.76043800 | 1.71017900  |
| H     | 2.60458200  | -1.16259600 | 1.90641200  |
| O     | 1.92857300  | -1.26339900 | -0.72292600 |
| H     | 2.52005300  | -1.91470600 | -0.32430800 |
| O     | -0.10925200 | 1.36865800  | 0.59188000  |
| H     | -1.07301200 | 1.49611000  | 0.61756900  |
| O     | -2.02793700 | -0.46638100 | -0.88732800 |
| S     | -3.35851700 | 0.07282400  | -0.11516100 |
| O     | -3.80265100 | -1.02117900 | 0.75325700  |
| O     | -4.25279900 | 0.37822800  | -1.22810900 |
| O     | -2.90290300 | 1.25707600  | 0.63993800  |
| C     | -0.88963700 | -0.84503500 | -0.08535100 |
| H     | -1.18946900 | -0.99430300 | 0.95546200  |
| H     | -0.53043600 | -1.78784900 | -0.49431100 |
| C     | 1.54444600  | -0.32615100 | 0.23717400  |
| O     | 2.39920800  | 0.84260400  | 0.11817500  |
| O     | 3.71354400  | 0.47570400  | 0.41455100  |
| N     | 4.40148100  | 0.34050300  | -0.82459400 |
| O     | 5.50610600  | 0.06420700  | -0.61227400 |
| 1-im7 |             |             |             |
| C     | -2.40013300 | 0.29656600  | -0.19098800 |
| H     | -3.23396600 | 0.63569800  | -0.78742100 |
| O     | -2.38776500 | -1.03924300 | 0.07337800  |
| H     | -1.49962500 | -1.29632400 | 0.38703800  |
| O     | -0.06463500 | 0.84535000  | -0.66359900 |
| S     | 1.06509300  | -0.10369100 | 0.01004000  |
| O     | 1.66641400  | 0.67342200  | 1.09983300  |
| O     | 1.96402900  | -0.37959400 | -1.10968800 |
| O     | 0.33181700  | -1.29137800 | 0.50008800  |
| C     | -1.25635100 | 1.14236100  | 0.16680200  |
| H     | -0.96384100 | 1.03045000  | 1.21601500  |
| H     | -1.48401800 | 2.18720900  | -0.03124500 |

## 1-im8

|   |             |             |             |
|---|-------------|-------------|-------------|
| C | 0.12988500  | 0.40963400  | 0.00001800  |
| H | 0.19322700  | 1.50613500  | 0.00002600  |
| O | 1.16791400  | -0.26575100 | -0.00001300 |
| C | -1.16639000 | -0.17331900 | -0.00000300 |
| H | -1.26941700 | -1.25163800 | 0.00006300  |
| H | -2.04809900 | 0.45362000  | -0.00007700 |

## 1-ts2

|   |             |             |             |
|---|-------------|-------------|-------------|
| C | -0.72649500 | 1.26719900  | 0.11947800  |
| C | 0.27229000  | 0.31074500  | -0.53848100 |
| H | -0.00742900 | 0.17519600  | -1.58726900 |
| C | -0.81215800 | 1.24919200  | 1.61909800  |
| H | -0.96846500 | 0.24002900  | 1.99322900  |
| H | 0.12889500  | 1.64341600  | 2.01432300  |
| H | -1.62168100 | 1.89892300  | 1.95937900  |
| O | -3.28969100 | 1.77429300  | -0.15262500 |
| H | -3.59562800 | 1.57284500  | 0.74508300  |
| O | -0.59273800 | 2.50764800  | -0.42719200 |
| H | -1.05861200 | 3.16557900  | 0.11000800  |
| O | 0.25274200  | -0.95403200 | 0.08019800  |
| H | 0.98845300  | -1.02177500 | 0.71081700  |
| O | 2.62076400  | 0.01845600  | -1.00117600 |
| S | 3.68432500  | -0.60150400 | 0.07521300  |
| O | 4.52749000  | 0.51942800  | 0.50080100  |
| O | 4.36664500  | -1.61567700 | -0.72317200 |
| O | 2.85127700  | -1.13886900 | 1.16783400  |
| C | 1.66164600  | 0.95650000  | -0.48969500 |
| H | 1.92021200  | 1.25003300  | 0.53144800  |
| H | 1.69253800  | 1.83410900  | -1.13081500 |
| C | -2.38376400 | 0.82789200  | -0.55175400 |
| H | -2.18060100 | 0.92380500  | -1.61967300 |
| O | -2.44322400 | -0.34025800 | -0.02483600 |
| O | -3.91189300 | -1.18429800 | -0.64699600 |
| N | -4.61187900 | -1.44870800 | 0.39841800  |
| O | -5.63547800 | -2.03497900 | 0.14332200  |

## 1-ts3

|   |            |             |             |
|---|------------|-------------|-------------|
| C | 0.10629900 | 0.40986400  | -0.75612600 |
| H | 0.51281100 | 0.55217800  | -1.75211300 |
| C | 1.15921400 | -0.09854600 | 1.70216600  |
| H | 0.96252200 | 0.95252600  | 1.90276700  |
| H | 0.31096500 | -0.71050200 | 2.00712800  |
| H | 2.04148800 | -0.41592700 | 2.26324600  |
| O | 1.63925600 | -1.62250700 | -0.06178400 |
| H | 2.00025600 | -1.70299100 | -0.95780200 |



|        |             |             |             |
|--------|-------------|-------------|-------------|
| O      | -0.29307100 | 1.57828200  | -0.21973300 |
| H      | -0.96344700 | 1.43010100  | 0.47921100  |
| O      | -2.16529800 | -0.25658700 | -1.10459400 |
| S      | -3.27231300 | -0.00440000 | 0.08624500  |
| O      | -3.63213800 | -1.33241900 | 0.58300900  |
| O      | -4.32644800 | 0.70216200  | -0.62943000 |
| O      | -2.55528600 | 0.80885500  | 1.08914600  |
| C      | -0.89303600 | -0.75922500 | -0.68673400 |
| H      | -0.96095900 | -1.19416900 | 0.31088400  |
| H      | -0.59502800 | -1.52617500 | -1.39634900 |
| C      | 1.47688800  | -0.29494800 | 0.24632600  |
| O      | 2.25301300  | 0.54595300  | -0.35277100 |
| O      | 3.90740300  | 0.48836300  | 0.41179400  |
| N      | 4.67089400  | 0.02636300  | -0.51215500 |
| O      | 5.82956400  | -0.04235800 | -0.17633700 |
| 1-ts4  |             |             |             |
| C      | 2.44240600  | -0.11757900 | -0.23226000 |
| H      | 3.28709700  | -0.25248500 | -0.90036600 |
| O      | 2.19683400  | 1.11026900  | 0.12278100  |
| H      | 1.23350000  | 1.17501300  | 0.47845800  |
| O      | -0.07729300 | -0.78560800 | -0.86712600 |
| S      | -1.06332600 | 0.03102300  | -0.01427300 |
| O      | -1.69127900 | -0.85660500 | 0.98982000  |
| O      | -2.05245100 | 0.65030200  | -0.92075000 |
| O      | -0.25296300 | 1.09843800  | 0.69142500  |
| C      | 1.64754300  | -1.18997800 | 0.17341000  |
| H      | 1.11390400  | -1.14118100 | 1.11441400  |
| H      | 1.85624100  | -2.16675000 | -0.24024800 |
| 1-ts5  |             |             |             |
| C      | -1.15890000 | 0.06515900  | 0.00001900  |
| H      | -2.21453700 | 0.38528000  | 0.00006100  |
| O      | -0.88167100 | -1.11429200 | -0.00001600 |
| C      | -0.15490900 | 1.16192500  | -0.00000900 |
| H      | -0.23297200 | 1.77843800  | 0.89820200  |
| H      | -0.23284700 | 1.77821300  | -0.89838900 |
| O      | 1.91943400  | -0.25361800 | 0.00000300  |
| H      | 0.92968700  | 0.67109900  | 0.00011300  |
| H      | 1.33141800  | -1.03225800 | 0.00004900  |
| CH3CHO |             |             |             |
| C      | 0.23474800  | 0.39888400  | -0.00002500 |
| H      | 0.31789700  | 1.50473400  | 0.00002200  |
| O      | 1.22597200  | -0.27825600 | -0.00000500 |
| C      | -1.16469500 | -0.14715200 | -0.00003500 |
| H      | -1.14849000 | -1.23553600 | -0.00020100 |

|                      |             |             |             |
|----------------------|-------------|-------------|-------------|
| H                    | -1.69908600 | 0.22345200  | -0.87901800 |
| H                    | -1.69841600 | 0.22300600  | 0.87959800  |
| CH <sub>3</sub> COOH |             |             |             |
| O                    | 0.78649900  | -1.02932300 | 0.00003800  |
| H                    | 1.72534200  | -0.79905600 | 0.00006400  |
| C                    | 0.09031500  | 0.12664300  | -0.00010300 |
| O                    | 0.62701000  | 1.19862700  | -0.00004200 |
| C                    | -1.38980900 | -0.12192800 | 0.00005200  |
| H                    | -1.66039600 | -0.70608400 | -0.88050300 |
| H                    | -1.66022600 | -0.70601600 | 0.88070600  |
| H                    | -1.91583700 | 0.82844100  | 0.00006900  |
| HCOOH                |             |             |             |
| O                    | 1.11069600  | -0.08913600 | 0.00001600  |
| H                    | 1.05183200  | -1.05532200 | -0.00010600 |
| C                    | -0.13523600 | 0.39892300  | 0.00000400  |
| H                    | -0.10956000 | 1.49502600  | -0.00006900 |
| O                    | -1.12705300 | -0.26502000 | 0.00000300  |
| HSO <sub>4</sub>     |             |             |             |
| H                    | 1.98574000  | 0.25899200  | 0.00157300  |
| O                    | -0.24268600 | 0.82601400  | 1.22716700  |
| S                    | -0.14810300 | 0.02957500  | -0.00018900 |
| O                    | -0.23788800 | 0.82700100  | -1.22730600 |
| O                    | -0.90330300 | -1.21602100 | -0.00211900 |
| O                    | 1.43186500  | -0.52851800 | 0.00244000  |
| 3-im <sub>2</sub>    |             |             |             |
| C                    | -3.11040800 | -0.41862000 | 0.67982900  |
| H                    | -2.93836600 | -0.26959400 | 1.74789000  |
| H                    | -2.98151600 | -1.47594600 | 0.43417200  |
| C                    | -2.12688400 | 0.43129400  | -0.13151600 |
| C                    | -2.16864600 | 1.88972500  | 0.31699300  |
| H                    | -1.80710000 | 1.99377500  | 1.34149700  |
| H                    | -1.56357100 | 2.51313200  | -0.34337600 |
| H                    | -3.19925800 | 2.24550700  | 0.27138600  |
| O                    | -4.41740300 | 0.01412700  | 0.31492600  |
| H                    | -5.04611400 | -0.66272500 | 0.58550700  |
| O                    | -2.44512800 | 0.32920300  | -1.51377200 |
| H                    | -3.40294100 | 0.44158500  | -1.58598400 |
| O                    | -0.44106000 | -0.31466000 | 1.36001600  |
| H                    | 0.52477500  | -0.34818400 | 1.51411900  |
| O                    | 1.54474500  | -0.09335200 | -0.91594200 |

|       |             |             |             |
|-------|-------------|-------------|-------------|
| S     | 2.79874800  | 0.20741000  | 0.09237400  |
| O     | 3.13005000  | 1.62214400  | -0.08137100 |
| O     | 3.80466600  | -0.73218400 | -0.38755700 |
| O     | 2.27457500  | -0.10040600 | 1.43933100  |
| C     | 0.34369100  | 0.66589100  | -0.73739400 |
| H     | 0.54540000  | 1.59708400  | -0.20345800 |
| H     | -0.02853200 | 0.89304400  | -1.73479100 |
| C     | -0.70628100 | -0.14073400 | 0.03130000  |
| O     | -0.75371100 | -1.47299000 | -0.65640700 |
| O     | 0.01931800  | -2.35332900 | -0.11674900 |
| 3-im3 |             |             |             |
| C     | 2.57826300  | -1.01910000 | 0.93492600  |
| H     | 2.16503500  | -1.53318300 | 1.80494800  |
| H     | 2.83728500  | 0.00132100  | 1.21109900  |
| C     | 1.55966900  | -1.05771600 | -0.21956600 |
| C     | 1.13053600  | -2.51216800 | -0.43337200 |
| H     | 0.52907100  | -2.86553500 | 0.40713800  |
| H     | 0.56124000  | -2.62181100 | -1.35702200 |
| H     | 2.02171900  | -3.13698600 | -0.50872500 |
| O     | 3.74238500  | -1.70058200 | 0.46526800  |
| H     | 4.51081700  | -1.32173400 | 0.90277000  |
| O     | 2.16137200  | -0.54480700 | -1.39952500 |
| H     | 3.01886400  | -0.98455700 | -1.48255800 |
| O     | 0.02161800  | -0.26680900 | 1.41447400  |
| H     | -0.92440700 | -0.07776700 | 1.56416500  |
| O     | -1.88846300 | 0.46039800  | -0.78870200 |
| S     | -3.23042600 | 0.10839100  | 0.07816500  |
| O     | -3.77919000 | -1.11932200 | -0.50112400 |
| O     | -4.04001600 | 1.30531600  | -0.12216300 |
| O     | -2.74325600 | -0.07238300 | 1.46074800  |
| C     | -0.85519200 | -0.53182300 | -0.85513300 |
| H     | -1.24315600 | -1.50982700 | -0.56779800 |
| H     | -0.51847000 | -0.56348200 | -1.89053500 |
| C     | 0.31960700  | -0.16314100 | 0.06216200  |
| O     | 0.52220800  | 1.21811800  | -0.30089600 |
| O     | 1.59582400  | 1.75318400  | 0.42151500  |
| N     | 2.54890200  | 2.19365700  | -0.53135200 |
| O     | 3.46866900  | 2.62031200  | 0.03181000  |
| 3-im4 |             |             |             |
| O     | 0.98915900  | -0.74533000 | 0.15809800  |
| S     | -0.46153000 | 0.04348400  | -0.01042300 |
| O     | -0.39624300 | 1.16570700  | 0.92834000  |
| O     | -1.39953900 | -1.01249200 | 0.35892100  |
| O     | -0.51110800 | 0.44844800  | -1.41702500 |

|       |             |             |             |
|-------|-------------|-------------|-------------|
| C     | 2.13077300  | 0.00166400  | -0.04704200 |
| H     | 2.11350200  | 1.04170800  | 0.25426300  |
| H     | 3.02819900  | -0.59809200 | -0.03191800 |
| 3-im5 |             |             |             |
| O     | -0.25242500 | 0.17202900  | -0.84016600 |
| S     | 1.12930800  | -0.09268300 | 0.05399200  |
| O     | 1.72241400  | 1.23554100  | 0.21589000  |
| O     | 1.86009900  | -0.99358000 | -0.82929500 |
| O     | 0.66499600  | -0.68853900 | 1.30750900  |
| C     | -1.25727900 | 0.93363800  | -0.23951500 |
| H     | -0.87927400 | 1.65593600  | 0.48365500  |
| H     | -1.84700000 | 1.39262100  | -1.02916000 |
| O     | -2.13763400 | 0.07863900  | 0.52782100  |
| O     | -2.83232200 | -0.70002200 | -0.24191800 |
| 3-im6 |             |             |             |
| O     | -0.28031400 | 0.25616600  | 0.82202000  |
| S     | -1.57435600 | -0.28156500 | -0.06157700 |
| O     | -2.65709700 | 0.65207100  | 0.26141100  |
| O     | -1.74480100 | -1.62798200 | 0.47608300  |
| O     | -1.14919400 | -0.22213700 | -1.46234400 |
| C     | 0.29435700  | 1.48374600  | 0.44083800  |
| H     | -0.41933000 | 2.15635100  | -0.03892400 |
| H     | 0.72725000  | 1.92026100  | 1.33874900  |
| O     | 1.30046500  | 1.29314000  | -0.53427600 |
| O     | 2.36194900  | 0.61572800  | 0.07860900  |
| N     | 2.23841800  | -0.76682400 | -0.27180400 |
| O     | 3.09983100  | -1.35527200 | 0.22637300  |
| 3-im7 |             |             |             |
| O     | -0.50880700 | 0.73744600  | -0.63907700 |
| S     | 0.78298400  | -0.06514900 | 0.03897600  |
| O     | 1.14708500  | 0.71228000  | 1.22277900  |
| O     | 1.75555900  | -0.02924500 | -1.04628600 |
| O     | 0.24521300  | -1.39838600 | 0.34675700  |
| C     | -1.69154900 | 0.68511300  | 0.09081700  |
| H     | -1.83196200 | -1.21696400 | 0.06082500  |
| H     | -2.27052700 | 1.59636200  | 0.02008500  |
| O     | -2.42354600 | -0.45305800 | -0.04035300 |
| 3-im8 |             |             |             |
| C     | 0.06059700  | 0.58295100  | 0.00000000  |
| H     | -0.84836400 | 1.23108500  | 0.00000000  |
| O     | 0.06059700  | -0.59109900 | 0.00000000  |
| 3-ts2 |             |             |             |
| C     | 2.85221900  | -0.90853000 | 0.42177700  |
| H     | 2.75746300  | -0.40997400 | 1.38742000  |

|       |             |             |             |
|-------|-------------|-------------|-------------|
| H     | 3.26690200  | -0.20893000 | -0.30734800 |
| C     | 1.46930200  | -1.37010100 | -0.06776900 |
| C     | 0.89273900  | -2.45625900 | 0.82697700  |
| H     | 0.85417700  | -2.12055400 | 1.86314400  |
| H     | -0.11482300 | -2.73838600 | 0.51263100  |
| H     | 1.53287000  | -3.33648800 | 0.76648000  |
| O     | 3.72356200  | -2.01058500 | 0.59852300  |
| H     | 3.86238200  | -2.41746200 | -0.26556200 |
| O     | 1.66282000  | -1.83117800 | -1.39662600 |
| H     | 1.08779400  | -2.58772400 | -1.56603300 |
| O     | 0.04214200  | 0.16750700  | 1.10689500  |
| H     | -0.40976900 | 1.02779100  | 1.08999000  |
| O     | -1.82928300 | 0.38633600  | -0.98854900 |
| S     | -2.98409800 | 0.00680700  | 0.20078800  |
| O     | -2.66368900 | -1.35740000 | 0.60751100  |
| O     | -4.22534800 | 0.16372200  | -0.54543100 |
| O     | -2.74622200 | 1.03427200  | 1.20993700  |
| C     | -0.80410700 | -0.45776000 | -1.26472000 |
| H     | -0.96245500 | -1.48977700 | -0.94244000 |
| H     | -0.46504700 | -0.35454900 | -2.28717600 |
| C     | 0.55096800  | -0.12983800 | -0.11266500 |
| O     | 0.82597400  | 0.85321500  | -0.90965000 |
| O     | 2.18501500  | 1.87666400  | -0.21597400 |
| N     | 1.64536000  | 3.03254700  | -0.09401000 |
| O     | 2.40650500  | 3.87172700  | 0.32995700  |
| 3-ts3 |             |             |             |
| O     | -0.98008000 | 0.93575800  | 0.80746000  |
| S     | -1.51779000 | -0.46509100 | -0.06051900 |
| O     | -1.71954400 | 0.05186400  | -1.40751200 |
| O     | -2.72030800 | -0.75872600 | 0.69680600  |
| O     | -0.42555900 | -1.41165600 | 0.09105300  |
| C     | -0.05933300 | 1.73907200  | 0.27827200  |
| H     | -0.22842500 | 2.11437700  | -0.90769500 |
| H     | 0.11754200  | 2.63595700  | 0.87459900  |
| O     | 0.85944900  | 1.29621300  | -0.52856300 |
| O     | 2.16120000  | 0.39244400  | 0.46188900  |
| N     | 2.68177200  | -0.42535400 | -0.36246700 |
| O     | 3.57223100  | -1.10162700 | 0.11249600  |
| 3-ts4 |             |             |             |
| O     | 0.38908500  | -0.94410600 | -0.53307400 |
| S     | -0.73126800 | -0.04298000 | 0.03337900  |
| O     | -0.85825000 | -0.22339300 | 1.46886900  |
| O     | -1.93013400 | -0.20319600 | -0.75973200 |
| O     | -0.17980100 | 1.41441700  | -0.25033400 |

|       |             |             |             |
|-------|-------------|-------------|-------------|
| C     | 1.89199100  | -0.66155700 | 0.08032500  |
| H     | 0.82148300  | 1.37436200  | -0.11492300 |
| H     | 2.43342100  | -1.46467300 | -0.42937200 |
| O     | 2.21578000  | 0.54969600  | 0.01530700  |
| 3-ts5 |             |             |             |
| C     | -0.76245200 | 0.49002200  | 0.00001000  |
| H     | -1.15754900 | 1.51991200  | 0.00010300  |
| O     | -1.45658000 | -0.48180600 | -0.00000900 |
| O     | 1.90875600  | -0.00611600 | -0.00002300 |
| H     | 1.73566900  | -0.96481200 | 0.00015900  |
| H     | 0.37918300  | 0.40814600  | -0.00006800 |
| HCHO  |             |             |             |
| C     | -0.52559800 | -0.00001200 | 0.00000800  |
| H     | -1.10704800 | -0.93961400 | -0.00001600 |
| O     | 0.67100300  | 0.00002500  | -0.00000200 |
| H     | -1.10738600 | 0.93948300  | -0.00001600 |
| P1    |             |             |             |
| C     | 1.07352600  | 0.78339200  | -0.58560700 |
| H     | 0.88412500  | 1.78347500  | -0.19816900 |
| H     | 0.83038100  | 0.76008500  | -1.65353300 |
| C     | 0.18980600  | -0.23150500 | 0.14910400  |
| C     | 0.39531400  | -0.19177600 | 1.66201300  |
| H     | 0.15200800  | 0.79411000  | 2.06003900  |
| H     | -0.24228900 | -0.93717200 | 2.14400800  |
| H     | 1.43777600  | -0.42134100 | 1.88482300  |
| O     | 2.44708600  | 0.50844400  | -0.37988500 |
| H     | 2.62766700  | -0.37518700 | -0.72306700 |
| O     | 0.53239200  | -1.49686600 | -0.38280700 |
| H     | 0.05151400  | -2.18280600 | 0.09791000  |
| O     | -1.61134500 | 1.32185500  | 0.11066400  |
| H     | -2.55424200 | 1.45574400  | -0.08224000 |
| C     | -1.27526000 | 0.06041200  | -0.16178500 |
| O     | -2.05404000 | -0.75843900 | -0.58698700 |
